# Supplementary material
Source: publisher figshare collection journal article supplement (https://acs.figshare.com/ndownloader/files/24539166)
Supplement: Supplementary file 1 [file 24539166]

## Supporting Information

### Bacterial Cellulose-Polyaniline Composite derived Hierarchical Nitrogen-Doped Porous Carbon Nanofibers as Anode for High Rate Lithium-Ion Batteries

*Mani Pujitha Illa<sup>1,2</sup>, Anil D Pathak<sup>2</sup>, Chandra S. Sharma<sup>2</sup>, Mudrika Khandelwal<sup>1,\*</sup>*

<sup>1</sup>Department of Materials Science and Metallurgical Engineering,

Indian Institute of Technology, Hyderabad, Kandi-502285, Sangareddy, Telangana, India

<sup>2</sup>Creative & Advanced Research Based on Nanomaterials (CARBON) Laboratory,

Department of Chemical Engineering,

Indian Institute of Technology, Hyderabad, Kandi-502285, Sangareddy, Telangana, India.

\*Corresponding author email: [mudrika@msme.iith.ac.in](mailto:mudrika@msme.iith.ac.in)

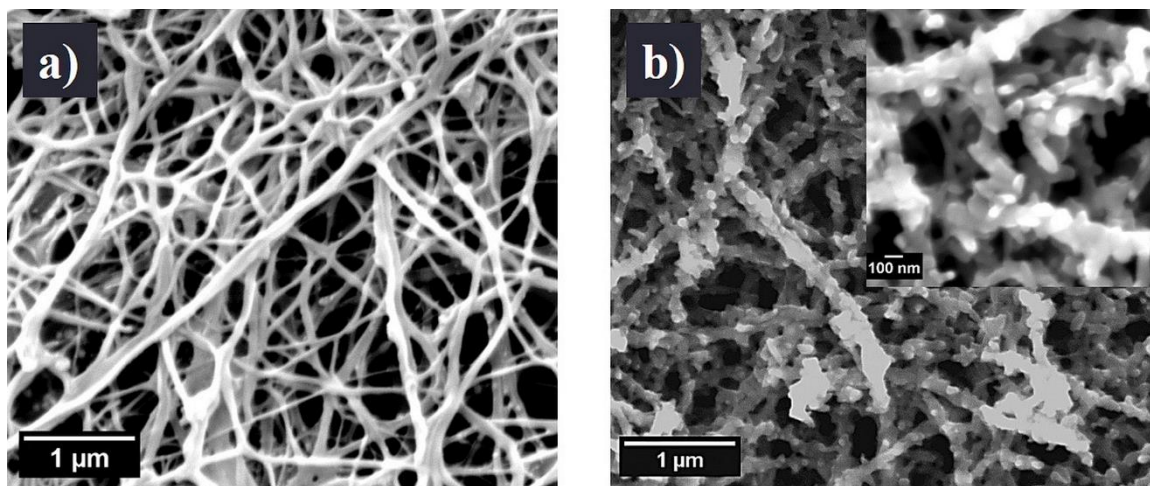

Figure S1. a) SEM micrograph of BC b) SEM micrograph of carbonized BC-PANI

Table S1 Textural properties of BC-PANI composite and its derived carbon

| Sample             | Type of isotherm | Specific surface area [ $\text{m}^2\text{g}^{-1}$ ] | Micro pore area [ $\text{m}^2\text{g}^{-1}$ ] | Average Pore volume [ $\text{ccg}^{-1}$ ] |
|--------------------|------------------|-----------------------------------------------------|-----------------------------------------------|-------------------------------------------|
| BC-PANI            | II               | 25                                                  | -                                             | 0.12                                      |
| Carbonized BC-PANI | II               | 159                                                 | 109                                           | 0.25                                      |
| BC-PANI_AC         | IV               | 2037                                                | 1004                                          | 0.75                                      |

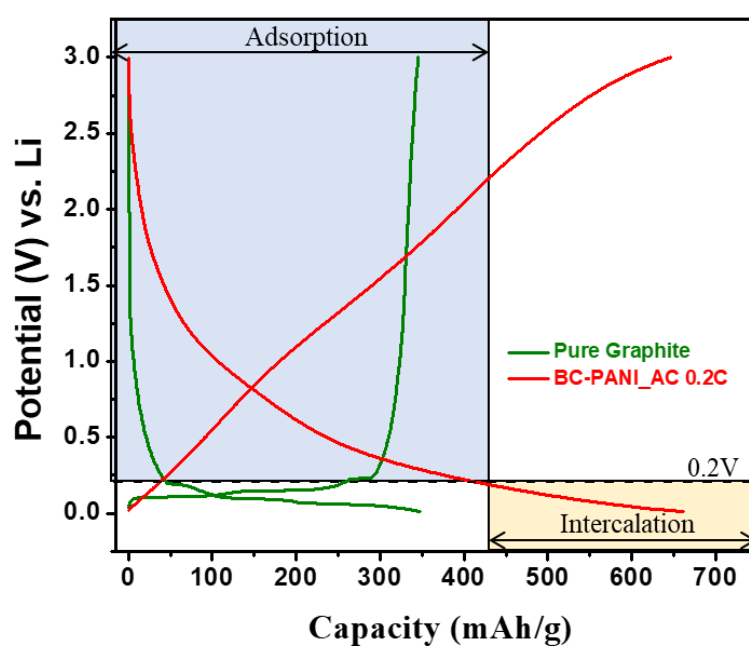

Figure S2. Charge-discharge curves of BC-PANI\_AC and pure graphite at 0.2C

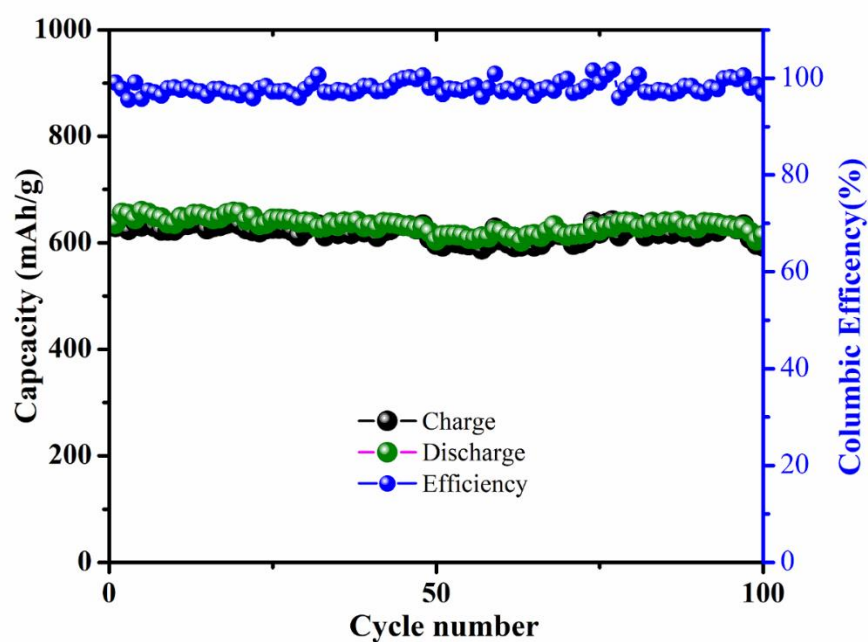

Figure S3. Cyclic stability performed at 0.2C

Table S2. Calculation of % interaction of nitrogen structures with lithium

| Structure  | Calculated binding energy (KJ/mol) | Normalised B.E                    | Atomic Contribution (%) based on area under curve from XPS | Relative contribution (From binding energy and atomic%) |
|------------|------------------------------------|-----------------------------------|------------------------------------------------------------|---------------------------------------------------------|
|            | (A)                                | $(B_i = A_i / \sum A \times 100)$ | (C <sub>i</sub> )                                          | $(D = 100 \times (B_i \times C_i) / \sum BC)$           |
| Pyrrolic N | -578                               | 30                                | 66                                                         | <b>63</b>                                               |
| Pyridine N | -735                               | 38                                | 10                                                         | <b>12</b>                                               |
| Oxidized N | -604                               | 32                                | 24                                                         | <b>25</b>                                               |
| Total      | -1917                              | 100                               | 100                                                        | <b>100</b>                                              |

### Calculation example for Pyrrolic N:

The calculated binding energy (B.E) of Li for Pyrrolic N from DFT = -578 KJ/mol.

$$\text{Therefore, Normalised B. E} = \frac{B.E \text{ of Pyrrolic N}}{B.E.of \text{ pyrrolic N} + B.E.of \text{ pyridine N} + B.E.of \text{ oxidized N}}$$

$$= \frac{-578}{-1917}$$

$$= \sim 30\%$$

The atomic contribution (%) of Pyrrolic N based on area under curve from XPS = 66%

$$\text{Relative contribuion of pyrrolic N (From B. E and XPS atomic \%)} = \frac{30 \times 66}{30 \times 66 + 38 \times 10 + 32 \times 24}$$

$$= \sim \mathbf{63\%}$$
